# Supplementary material
Source: PubMed Central journal article supplement (PMC3183403)
Supplement: NIHMS316886-supplement-1.pdf [file NIHMS316886-supplement-1.pdf]

## **SUPPLEMENTAL MATERIAL**

**Supplemental Table.** Predictors of a TH1(+) response to each antigen at 90 days after stroke. Laboratory data represent the most extreme value for the first 72 hours after stroke onset. Results are expressed as the odds ratio (OR) and 95% confidence interval (CI).

| antigen:                                                          | TT                             |              | PLP                           |              | MBP                            |              | NSE                     |    | GFAP                           |              | S100                   |       |
|-------------------------------------------------------------------|--------------------------------|--------------|-------------------------------|--------------|--------------------------------|--------------|-------------------------|----|--------------------------------|--------------|------------------------|-------|
|                                                                   | OR                             | P            | OR                            | P            | OR                             | P            | OR                      | P  | OR                             | P            | OR                     | P     |
| <b>baseline demographics</b>                                      |                                |              |                               |              |                                |              |                         |    |                                |              |                        |       |
| age (per year)                                                    | 1.008<br>(0.972-1.046)         | NS           | 1.006<br>(0.965-1.049)        | NS           | 1.022<br>(0.983-1.062)         | NS           | 1.002<br>(0.964-1.043)  | NS | 1.017<br>(0.977-1.059)         | NS           | 1.012<br>(0.974-1.051) | NS    |
| gender (female)                                                   | 0.526<br>(0.181-1.527)         | NS           | 0.223<br>(0.047-1.065)        | 0.060        | 0.605<br>(0.206-1.773)         | NS           | 0.649<br>(0.206-2.043)  | NS | 0.483<br>(0.142-1.643)         | NS           | 1.059<br>(0.387-2.897) | NS    |
| NIHSS score                                                       | <b>1.056</b><br>(1.003-1.112)  | <b>0.039</b> | <b>1.070</b><br>(1.008-1.136) | <b>0.025</b> | <b>1.099</b><br>(1.038-1.164)  | <b>0.001</b> | 1.023<br>(0.968-1.080)  | NS | <b>1.069</b><br>(1.011-1.131)  | <b>0.020</b> | 1.052<br>(0.998-1.109) | 0.059 |
| <b>stroke etiology</b>                                            |                                |              |                               |              |                                |              |                         |    |                                |              |                        |       |
| cardioembolic                                                     | 1.286<br>(0.460-3.594)         | NS           | 0.789<br>(0.226-2.762)        | NS           | 1.148<br>(0.398-3.310)         | NS           | 0.945<br>(0.295-3.027)  | NS | 1.354<br>(0.437-4.195)         | NS           | 1.425<br>(0.510-3.987) | NS    |
| lacunar                                                           | 0.347<br>(0.040-3.048)         | NS           | 0.644<br>(0.072-5.769)        | NS           | 1.010<br>(0.182-5.615)         | NS           | 2.719<br>(0.551-13.412) | NS | 1.271<br>(0.226-7.153)         | NS           | 0.917<br>(0.156-5.375) | NS    |
| atherosclerosis                                                   | 1.136<br>(0.260-4.961)         | NS           | 1.163<br>(0.218-6.221)        | NS           | <b>3.750</b><br>(0.907-15.497) | 0.068        | 0.924<br>(0.175-4.876)  | NS | 0.354<br>(0.041-3.032)         | NS           | 0.583<br>(0.109-3.121) | NS    |
| other known cause                                                 | 0.667<br>(0.227-1.955)         | NS           | 1.533<br>(0.486-4.840)        | NS           | 0.570<br>(0.184-1.769)         | NS           | 0.750<br>(0.237-2.372)  | NS | 1.051<br>(0.345-3.205)         | NS           | 0.600<br>(0.201-1.788) | NS    |
| unknown                                                           | 1.591<br>(0.533-4.751)         | NS           | 0.824<br>(0.206-3.303)        | NS           | 0.662<br>(0.193-2.274)         | NS           | 0.914<br>(0.261-3.202)  | NS | 0.944<br>(0.267-3.337)         | NS           | 1.596<br>(0.516-4.941) | NS    |
| <b>stroke characteristics and treatment</b>                       |                                |              |                               |              |                                |              |                         |    |                                |              |                        |       |
| infarct volume (per 10 cc)                                        | 1.038<br>(0.998-1.080)         | 0.066        | 1.037<br>(0.994-1.081)        | 0.089        | 1.038<br>(0.998-1.080)         | 0.063        | 1.000<br>(0.957-1.046)  | NS | 1.034<br>(0.993-1.077)         | 0.101        | 1.029<br>(0.990-1.071) | 0.150 |
| IV tPA                                                            | 2.062<br>(0.732-5.815)         | 0.171        | 1.364<br>(0.411-4.523)        | NS           | 0.729<br>(0.232-2.294)         | NS           | 0.706<br>(0.205-2.430)  | NS | 0.960<br>(0.297-3.097)         | NS           | 2.787<br>(0.981-7.918) | 0.054 |
| hemispherectomy                                                   | 4.417<br>(0.965-20.213)        | 0.056        | 2.723<br>(0.577-12.858)       | NS           | 1.590<br>(0.347-7.277)         | NS           | 1.098<br>(0.203-5.950)  | NS | 3.667<br>(0.819-16.415)        | 0.089        | 2.000<br>(0.456-8.763) | NS    |
| <b>inflammatory cytokine concentrations (highest by 72 hours)</b> |                                |              |                               |              |                                |              |                         |    |                                |              |                        |       |
| IL-6 (per pg/mL)                                                  | 1.010<br>(0.993-1.028)         | NS           | 1.003<br>(0.985-1.021)        | NS           | 1.002<br>(0.986-1.019)         | NS           | 1.000<br>(0.982-1.019)  | NS | 1.017<br>(0.996-1.039)         | 0.109        | 0.997<br>(0.979-1.015) | NS    |
| hsCRP (per 10 mg/L)                                               | 1.070<br>(0.975-1.016)         | 0.153        | 1.064<br>(0.963-1.177)        | NS           | 1.097<br>(0.998-1.207)         | 0.056        | 0.973<br>(0.872-1.085)  | NS | 1.063<br>(0.965-1.170)         | NS           | 1.026<br>(0.990-1.132) | NS    |
| TNF- $\alpha$ (per pg/mL)                                         | 1.226<br>(0.970-1.549)         | 0.089        | 1.042<br>(0.791-1.374)        | NS           | 1.100<br>(0.870-1.392)         | NS           | 1.010<br>(0.773-1.319)  | NS | 1.066<br>(0.835-1.362)         | NS           | 1.063<br>(0.810-1.395) | NS    |
| IL-2 (per pg/mL)                                                  | 3.396<br>(0.895-12.884)        | 0.072        | 1.235<br>(0.706-2.158)        | NS           | 1.090<br>(0.627-1.893)         | NS           | 0.914<br>(0.436-1.914)  | NS | 1.335<br>(0.741-2.403)         | NS           | 2.245<br>(0.670-7.421) | 0.185 |
| <b>laboratory values (highest by 72 hours)</b>                    |                                |              |                               |              |                                |              |                         |    |                                |              |                        |       |
| blood glucose (per 10 mg/dL)                                      | 0.957<br>(0.870-1.051)         | NS           | 1.014<br>(0.923-1.114)        | NS           | 1.045<br>(0.962-1.134)         | NS           | 1.014<br>(0.928-1.109)  | NS | 1.040<br>(0.954-1.133)         | NS           | 0.958<br>(0.871-1.053) | NS    |
| WBCs (per thou/mL)                                                | 1.014<br>(0.906-1.135)         | NS           | 0.981<br>(0.856-1.124)        | NS           | 1.070<br>(0.955-1.198)         | NS           | 0.975<br>(0.860-1.106)  | NS | 1.018<br>(0.900-1.152)         | NS           | 0.975<br>(0.869-1.094) | NS    |
| PMNs (per thou/mL)                                                | 1.088<br>(0.925-1.279)         | NS           | 1.098<br>(0.913-1.322)        | NS           | 1.157<br>(0.979-1.368)         | 0.087        | 0.963<br>(0.805-1.152)  | NS | 1.164<br>(0.969-1.399)         | 0.105        | 0.996<br>(0.845-1.174) | NS    |
| lymphs* (per thou/mL)                                             | 0.566<br>(0.215-1.489)         | NS           | <b>0.188</b><br>(0.043-0.813) | <b>0.025</b> | 0.729<br>(0.286-1.859)         | NS           | 0.933<br>(0.367-2.375)  | NS | <b>0.220</b><br>(0.059-0.825)  | <b>0.025</b> | 0.726<br>(0.295-1.789) | NS    |
| <b>complications</b>                                              |                                |              |                               |              |                                |              |                         |    |                                |              |                        |       |
| highest temp in 1 <sup>st</sup> 72 hrs (per °C)                   | <b>2.394</b><br>(1.111-5.158)  | <b>0.026</b> | <b>3.124</b><br>(1.306-7.469) | <b>0.010</b> | 1.678<br>(0.798-3.527)         | 0.172        | 1.068<br>(0.529-2.154)  | NS | <b>3.263</b><br>(1.390-7.661)  | <b>0.007</b> | 1.294<br>(0.633-2.645) | NS    |
| highest temp in 1 <sup>st</sup> week (per °C)                     | 1.347<br>(0.787-2.307)         | NS           | 1.481<br>(0.798-2.749)        | NS           | 1.534<br>(0.881-2.670)         | 0.130        | 1.334<br>(0.729-2.44)   | NS | 1.823<br>(0.986-3.371)         | 0.056        | 0.952<br>(0.567-1.598) | NS    |
| infection by day 15                                               | <b>3.214</b><br>(1.149-8.992)  | <b>0.026</b> | 1.800<br>(0.565-5.739)        | NS           | 2.225<br>(0.786-6.297)         | 0.132        | 0.873<br>(0.274-2.782)  | NS | 2.338<br>(0.786-6.956)         | 0.127        | 1.197<br>(0.419-3.413) | NS    |
| PNA by day 15                                                     | 2.550<br>(0.666-9.769)         | 0.172        | 3.222<br>(0.787-13.193)       | 0.104        | <b>4.765</b><br>(1.202-18.893) | <b>0.026</b> | 2.095<br>(0.541-8.120)  | NS | 3.857<br>(0.978-15.208)        | 0.054        | 0.913<br>(0.209-3.996) | NS    |
| gram positive infection                                           | <b>5.056</b><br>(1.323-19.313) | <b>0.018</b> | 2.714<br>(0.685-10.759)       | 0.155        | <b>3.741</b><br>(1.013-13.817) | <b>0.048</b> | 2.095<br>(0.541-8.120)  | NS | <b>4.985</b><br>(1.315-18.891) | <b>0.018</b> | 2.048<br>(0.534-7.859) | NS    |
| gram negative infection                                           | 1.895<br>(0.580-6.193)         | NS           | 0.619<br>(0.124-3.094)        | NS           | 1.011<br>(0.282-3.618)         | NS           | 0.443<br>(0.091-2.169)  | NS | 1.307<br>(0.358-4.774)         | NS           | 0.691<br>(0.193-2.467) | NS    |

TT=tetanus toxoid, PLP=proteolipid protein, MBP=myelin basic protein, NSE=neuron specific enolase, GFAP=glial fibrillary acidic protein, NIHSS=NIH stroke scale, IV tPA=intravenous tissue plasminogen activator, IL=interleukin, TNF=tumor necrosis factor, WBCs=white blood cells, PMNs=polymorphonuclear cells, lymphs=lymphocytes, temp=temperature, PNA=pneumonia. \*denotes lowest value by 72 hours. NS signifies  $P \geq 0.020$ .
